# Supplementary material for: Evaluating the impact of scoring parameters on the structure of intra-specific genetic variation using RawGeno, an R package for automating AFLP scoring
Source: PubMed Central journal article supplement (PMC2656475; doi:10.1186/1471-2105-10-33), 2009-01-26

# A. PLP

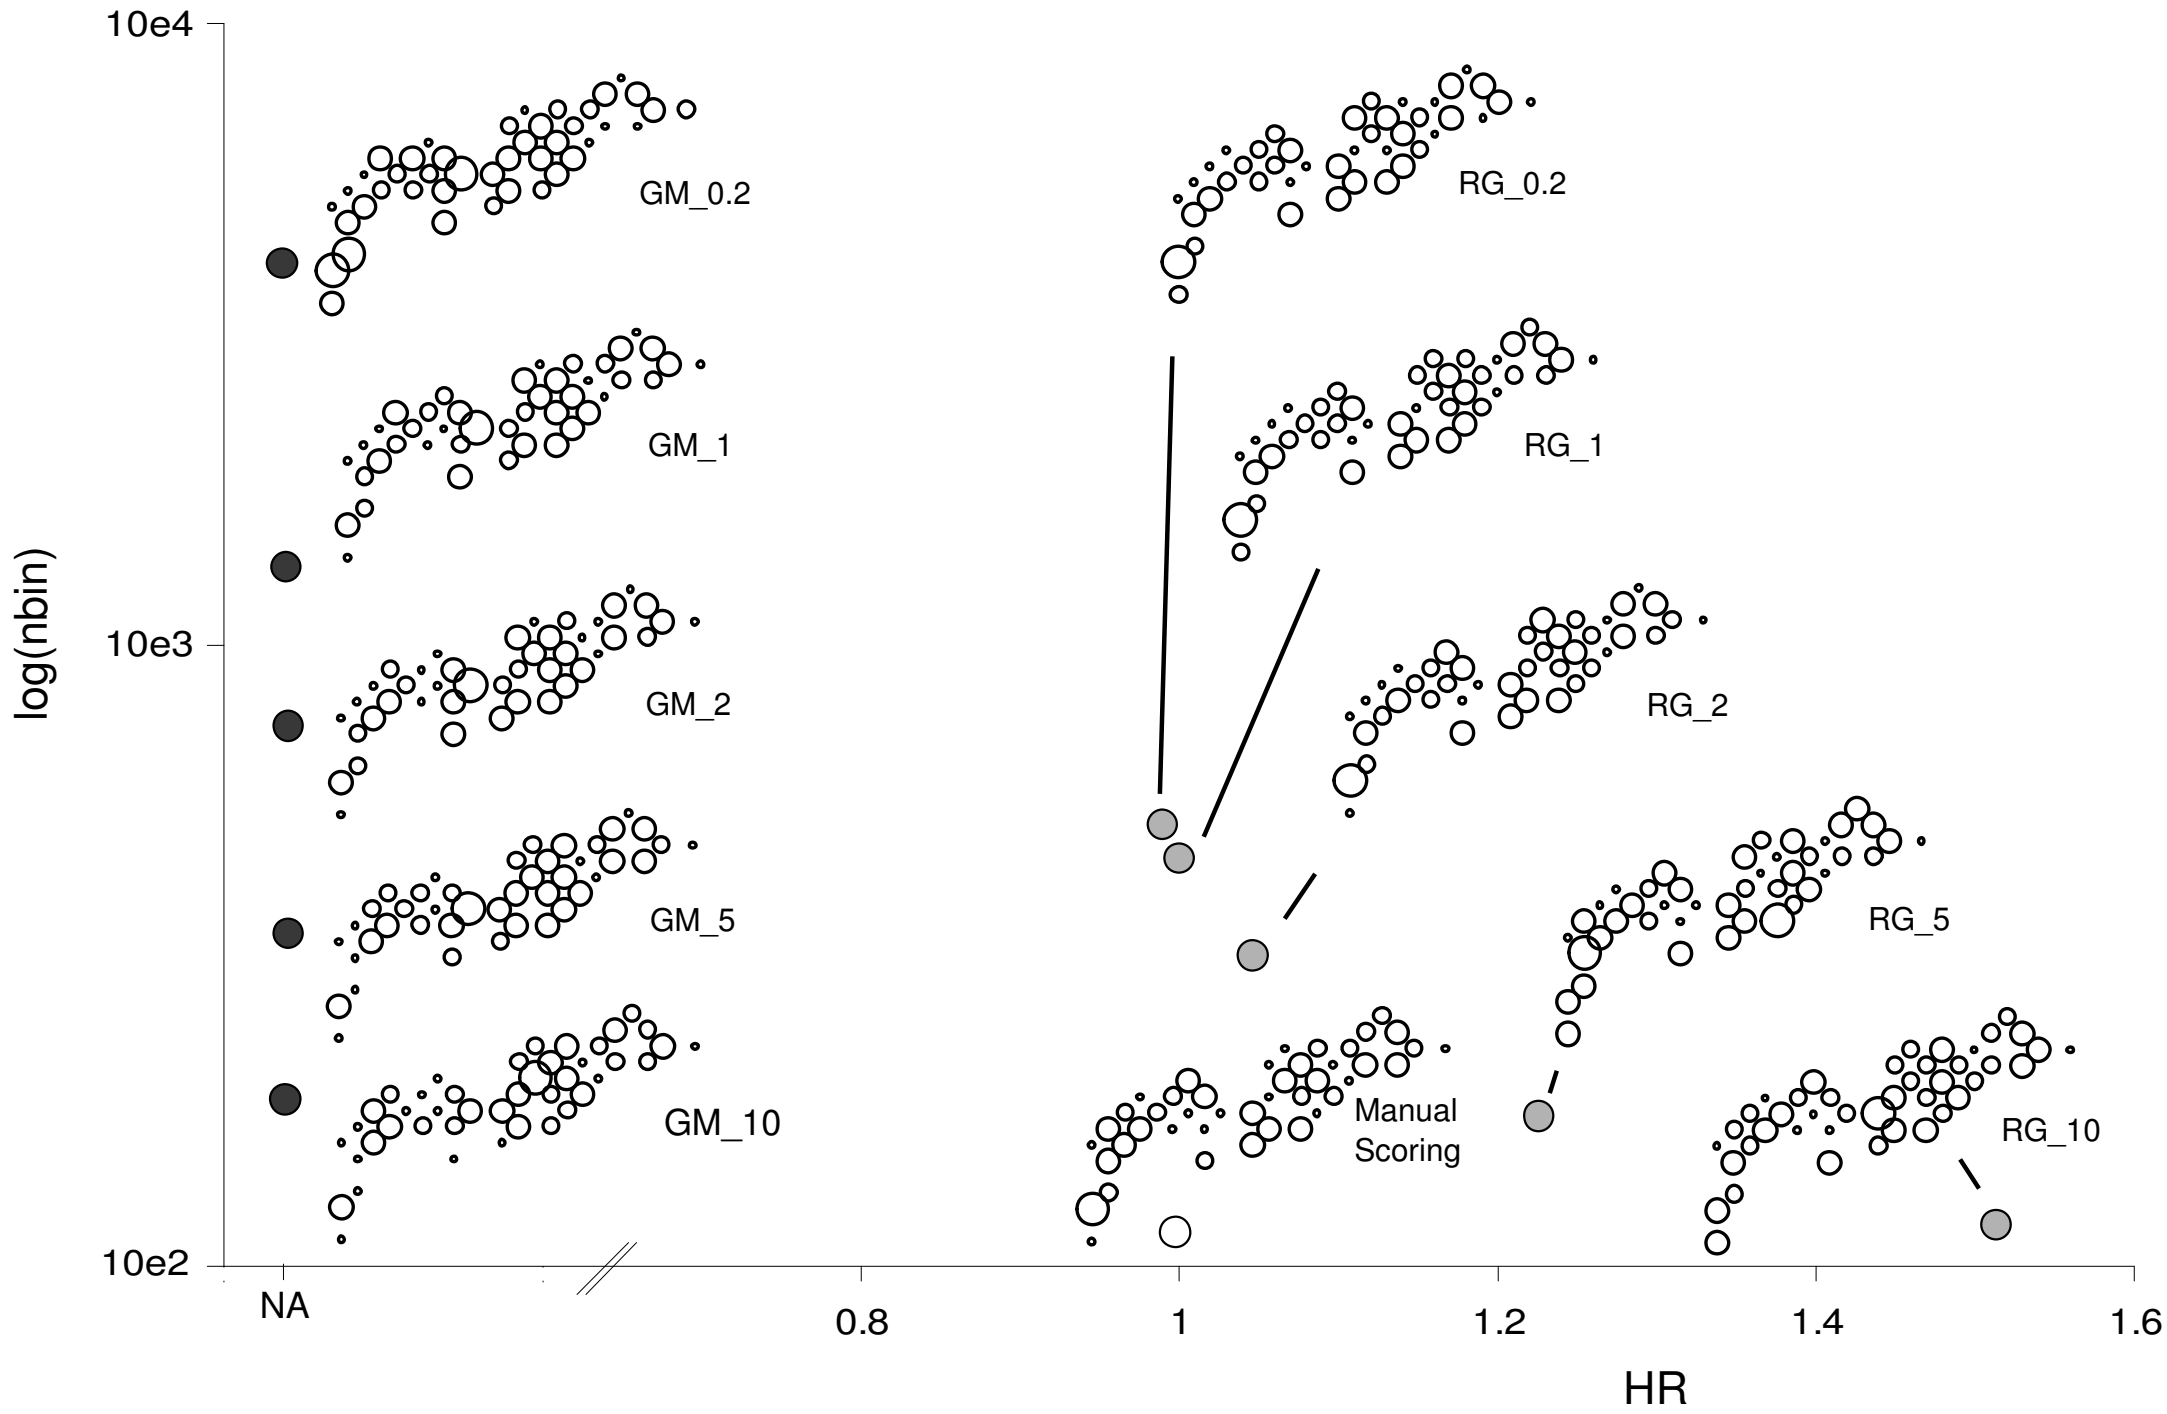

B. Hj

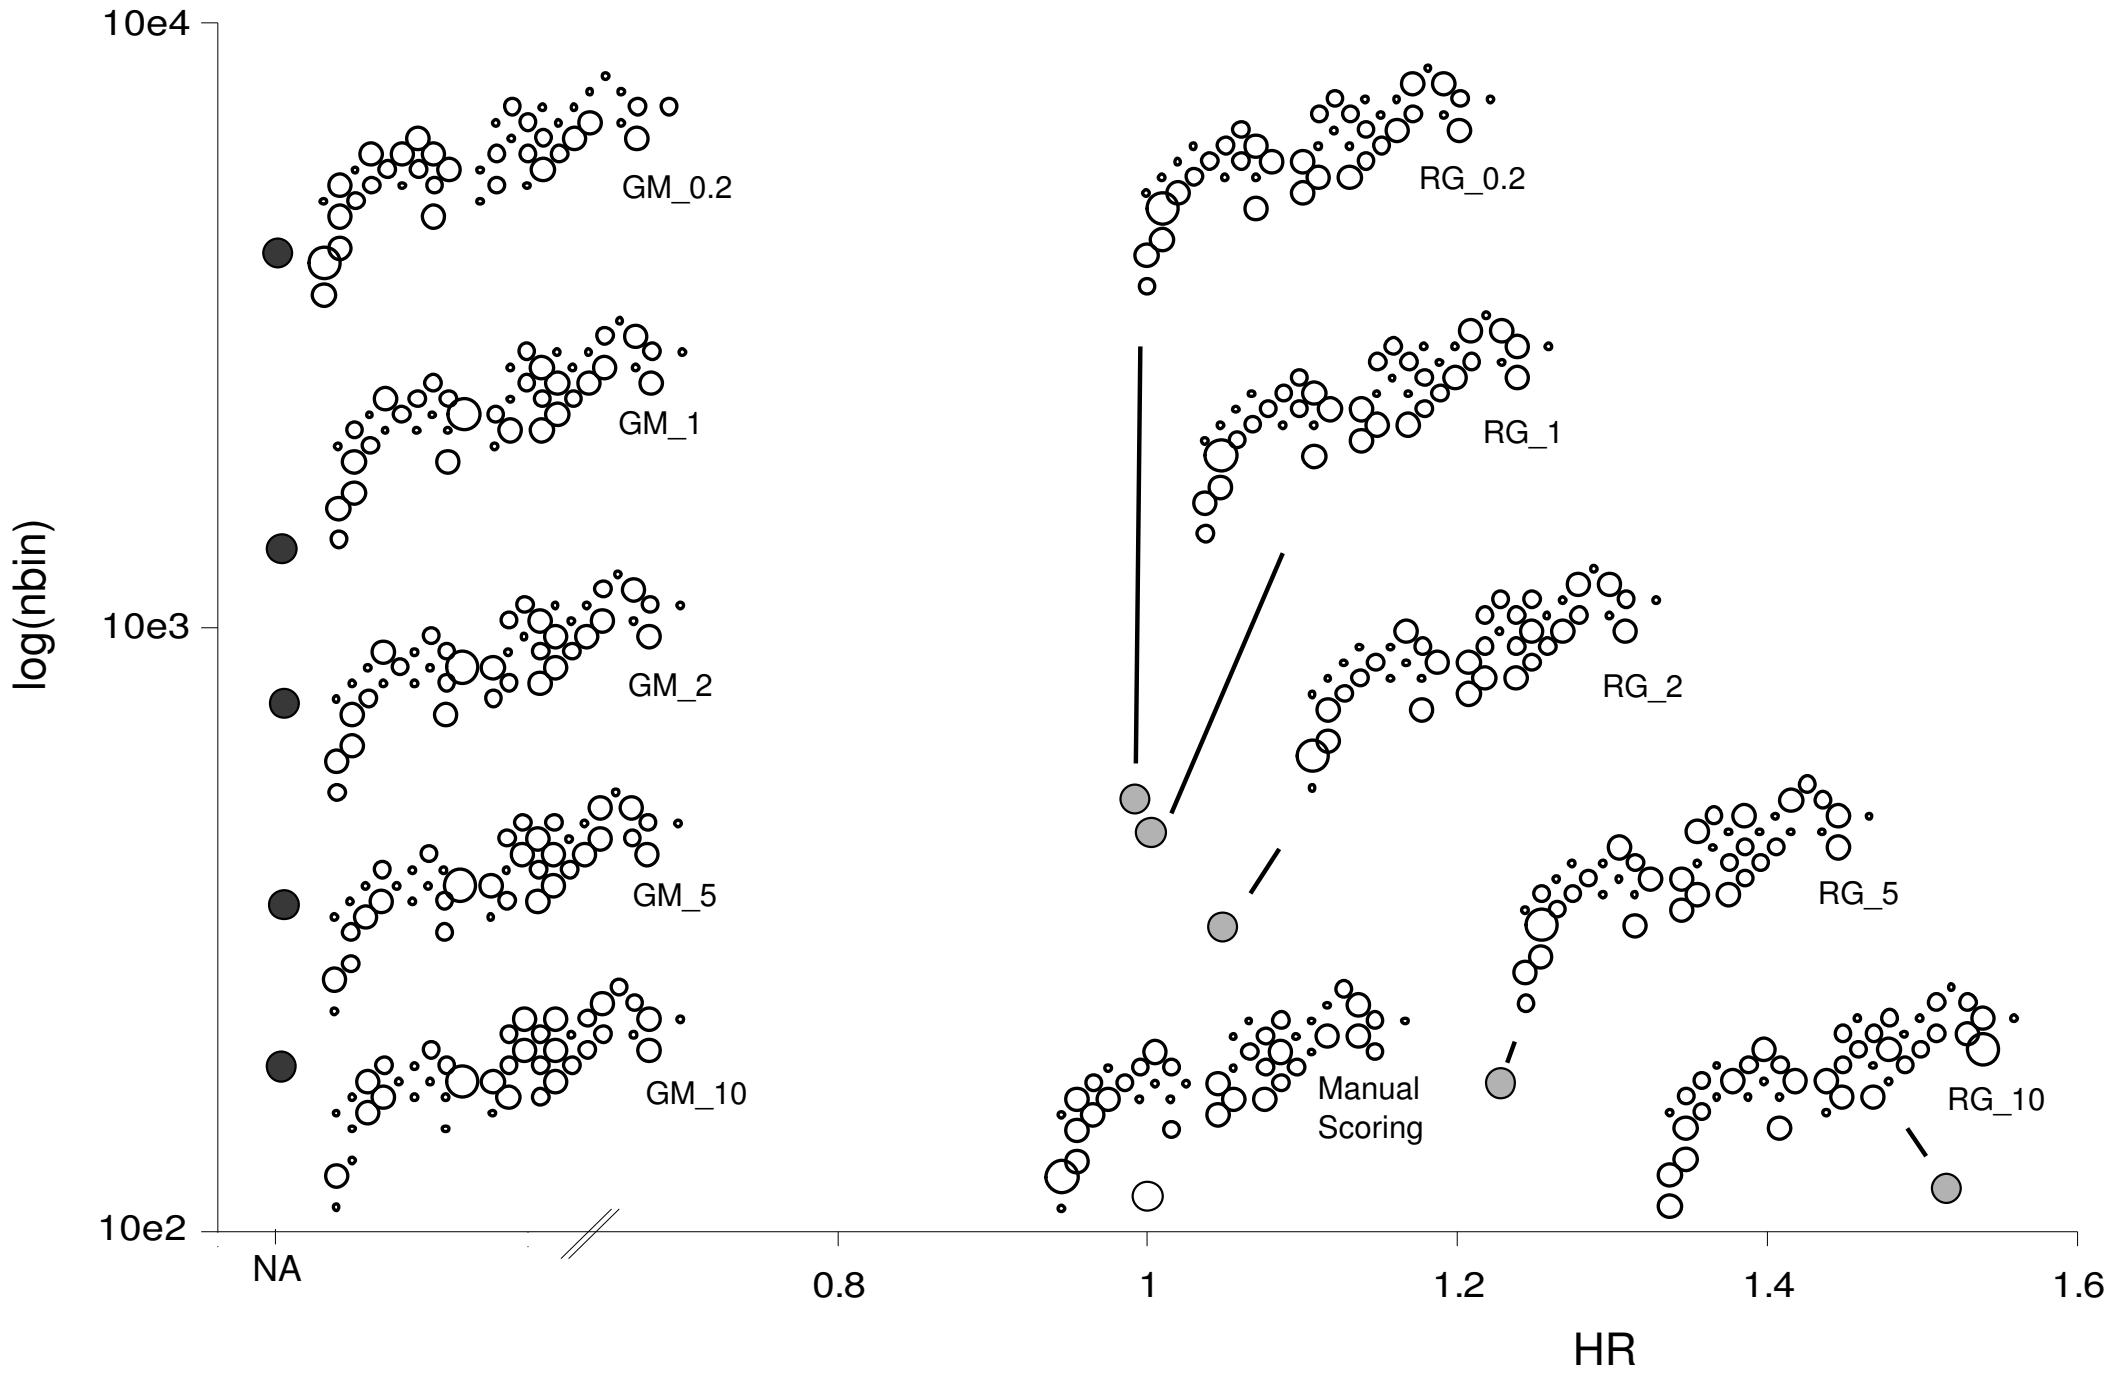

# C. Rarity index

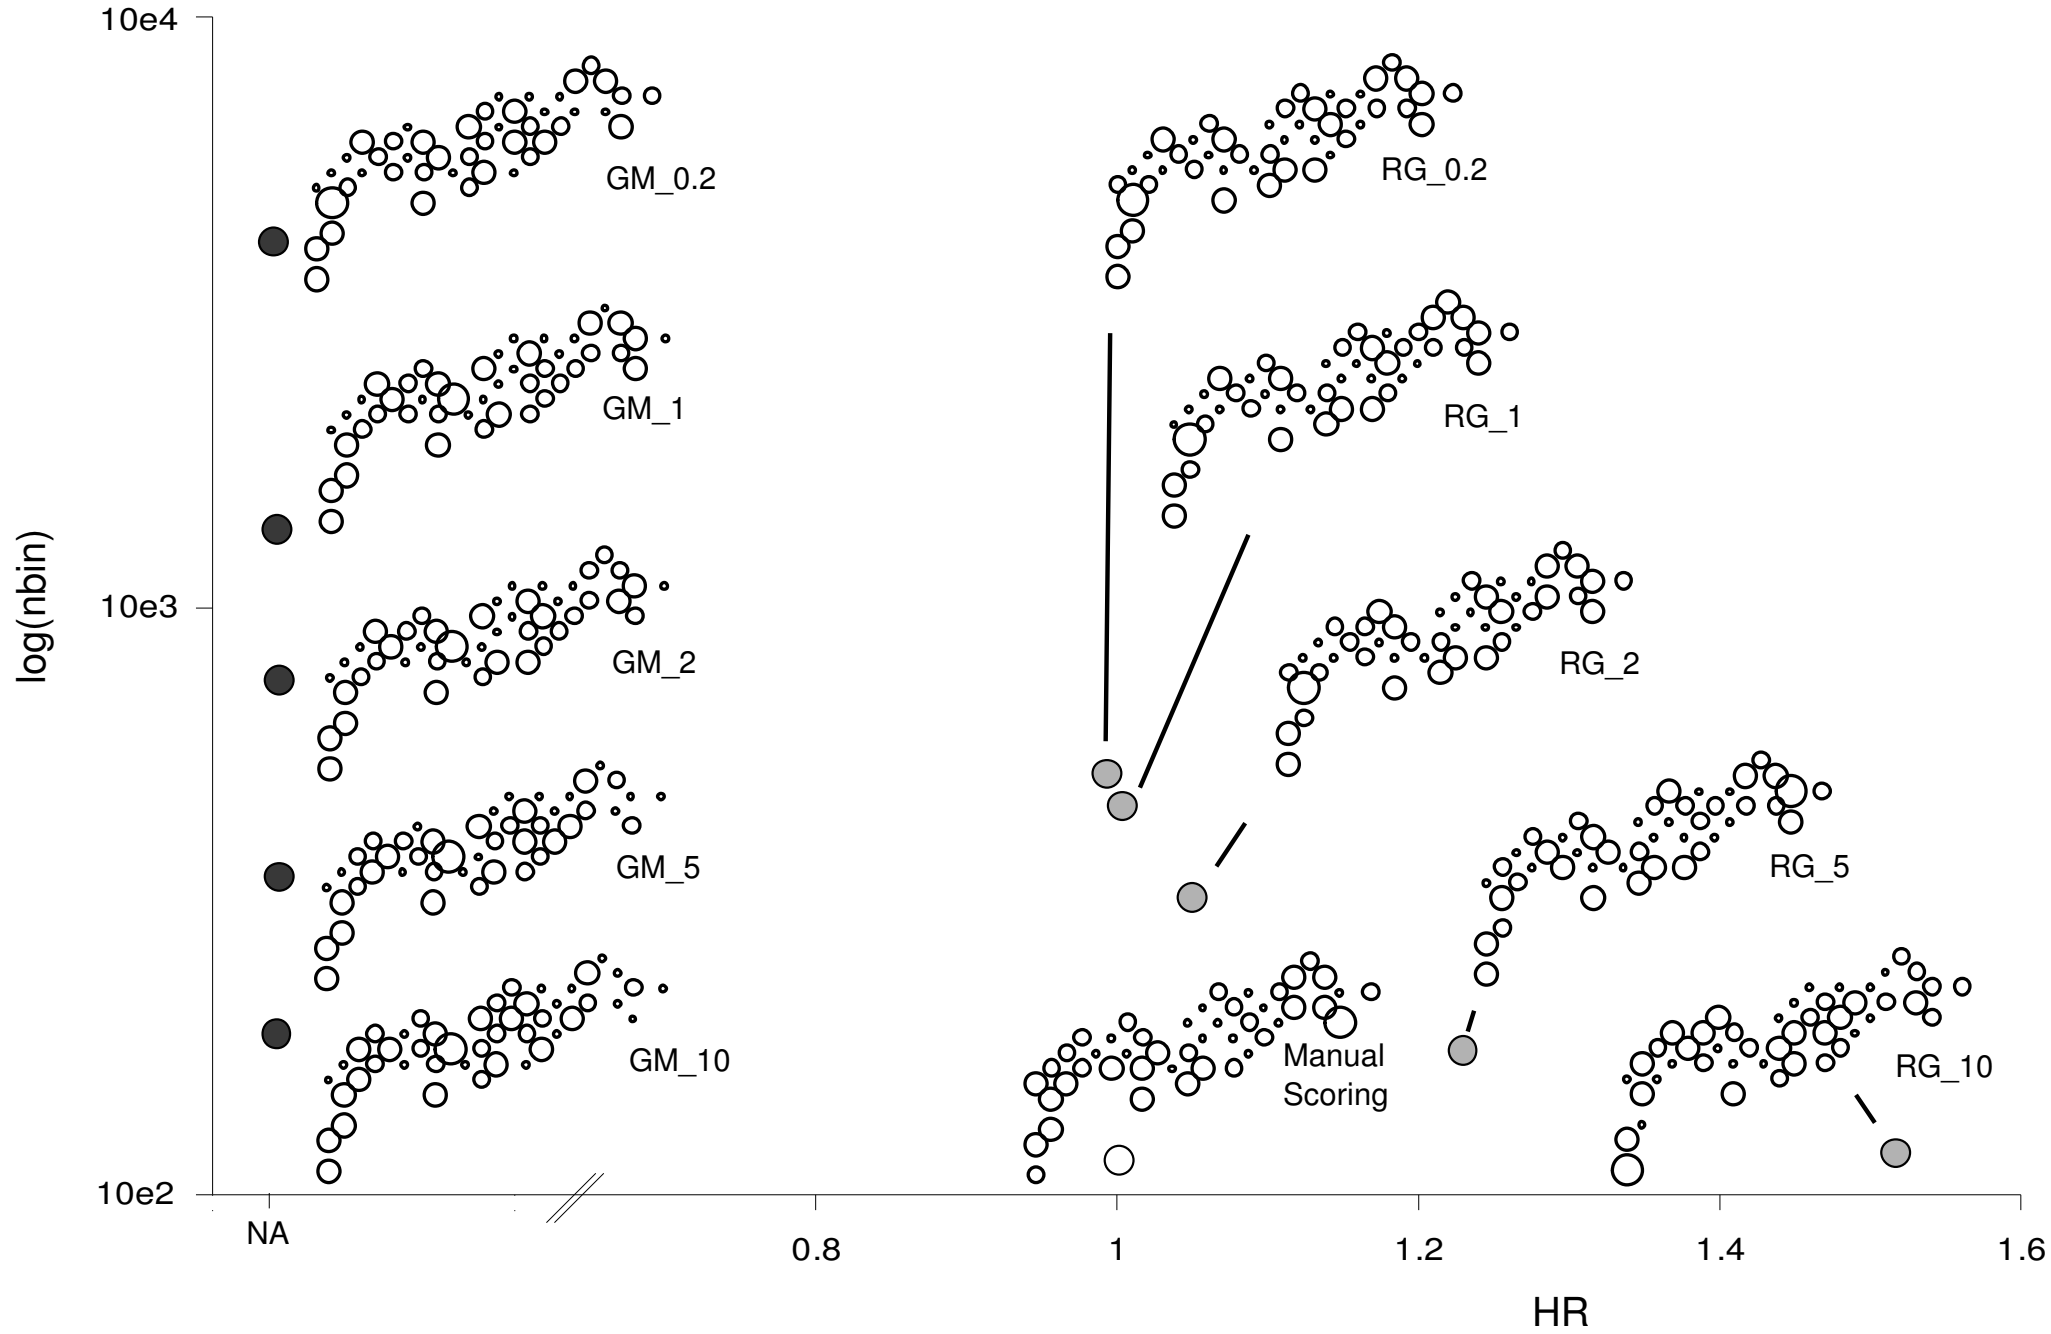

Supplement: 1471-2105-10-33-S3.pdf [file 1471-2105-10-33-S3.pdf]
